# Supplementary material for: Fluorescent photoswitches with improved emission efficiency based on aggregation-induced emission luminogens by eliminating the heavy-atom effect
Source: Royal Society of Chemistry journal article supplement (doi:10.1039/d3tc04727j), 2024-01-01
Supplement: d3tc04727j1.pdf [file d3tc04727j1.pdf]

## Electronic Supplementary Information *for*

# Fluorescent Photoswitches with Improved Emission Efficiency Based on Aggregation-Induced Emission Luminogens by Eliminating the Heavy-Atom Effect

Jiale Zhan,<sup>†</sup> Chuangye Yao,<sup>†</sup> Zhengdong Han, Yuzhen Wu, Hui Feng\* and Zhaosheng Qian\*

\*Corresponding authors. E-mails: fenghui@zjnu.cn; qianzhaosheng@zjnu.cn.

<sup>†</sup> These authors contributed to this work equally.

Key Laboratory of the Ministry of Education for Advanced Catalysis Materials, College of Chemistry and Materials Science, Zhejiang Normal University, Jinhua 321004, People's Republic of China.

### Table of Contents

#### 1. Experimental Section

#### 2. Computational Details

#### 3. Supplementary Schemes and Figures

**Scheme S1.** Synthesis routes of 1a, 2a, 3a and 4a.

**Figure S1.** UV-visible spectra of 1a, 2a, 3a and 4a in THF at 25.0  $\mu$ M.

**Figure S2.** Normalized PL spectra 1a, 2a, 3a and 4a in solid under transient UV irradiation.

**Figure S3. (a-b)** PL spectra and images of 1a (a) and 2a (b) in solution and in solid state. (c-d) PL spectra of 1a and 2a in THF (50.0 mM) within creasing amounts of water from 0% to 90%.

**Figure S4.** PL spectra of 3a and 4a in THF(50  $\mu$ M) at 77 K before and after irradiation.

**Figure S5.** Photochromic recycles of 1a (a), 2a (b), 3a (c) and 4a (d) in film as a function of exposure to UV-light (365 nm) and visible-light respectively.

#### 4. Supplementary Tables

**Table S1.** Optical properties of the four compounds in solution, film and solid.

**Table S2.** Experimental and computational data for  $S_0 \rightarrow S_1$  absorption maxima of cyclized forms 1a and 2a.

**Table S3.** Compositions of natural transition orbitals of cyclized forms 1a, 2a, 3a and 4a for  $S_0 \rightarrow S_1$  state.

**Table S4.** Contribution ratios of different groups to natural transition orbitals of 1a, 2a, 3a and 4a.

## 5. NMR and MS Spectra of Compounds

**Figure S6.**  $^1\text{H}$  NMR spectra of ((Z)-(1,2-diphenyl)-(Z)-di(4,4,5,5-tetramethyl-1,3,2-dioxaborolan-2-yl))ethene (DPDBE) in  $\text{CDCl}_3$

**Figure S7.**  $^{13}\text{C}$  NMR spectra of ((Z)-(1,2-diphenyl)-(Z)-di(4,4,5,5-tetramethyl-1,3,2-dioxaborolan-2-yl))ethene (DPDBE) in  $\text{CDCl}_3$

**Figure S8.**  $^1\text{H}$  NMR spectra of 3-bromo-2,5-dimethylthiophene (3-BDMT) in  $\text{CDCl}_3$

**Figure S9.**  $^{13}\text{C}$  NMR spectra of 3-bromo-2,5-dimethylthiophene (3-BDMT) in  $\text{CDCl}_3$

**Figure S10.**  $^1\text{H}$  NMR spectra of 3-(1,2,2-TriPhenylVinyl)Thiophene (3-TPVT) in  $\text{CDCl}_3$

**Figure S11.**  $^{13}\text{C}$  NMR spectra of 3-(1,2,2-TriPhenylVinyl)Thiophene (3-TPVT) in  $\text{CDCl}_3$

**Figure S12.**  $^1\text{H}$  NMR spectra of 3-(1,2,2-triphenylvinyl)thiophene 1,1-dioxide (3-TPVTO) in  $\text{CDCl}_3$

**Figure S13.**  $^{13}\text{C}$  NMR spectra of 3-(1,2,2-triphenylvinyl)thiophene 1,1-dioxide (3-TPVTO) in  $\text{CDCl}_3$

**Figure S14.**  $^1\text{H}$  NMR spectra of (E)-2-(2-(2,5-dimethylthiophen-3-yl)-1,2-diphenylvinyl)-4,4,5,5-tetramethyl-1,3,2-dioxaborolane (DPVBT) in  $\text{CDCl}_3$

**Figure S15.**  $^{13}\text{C}$  NMR spectra of (E)-2-(2-(2,5-dimethylthiophen-3-yl)-1,2-diphenylvinyl)-4,4,5,5-tetramethyl-1,3,2-dioxaborolane (DPVBT) in  $\text{CDCl}_3$

**Figure S16.**  $^1\text{H}$  NMR spectra of 2,5-dimethyl-3-(1,2,2-triphenylvinyl)thiophene (3-TPVMT) in  $\text{CDCl}_3$

**Figure S17.**  $^{13}\text{C}$  NMR spectra of 2,5-dimethyl-3-(1,2,2-triphenylvinyl)thiophene (3-TPVMT) in  $\text{CDCl}_3$

**Figure S18.**  $^1\text{H}$  NMR spectra of 2,5-dimethyl-3-(1,2,2-triphenylvinyl)thiophene 1,1-dioxide (3-TPVMTO) in  $\text{CDCl}_2$ , 2,5-dimethyl-3-(1,2,2-triphenylvinyl)thiophene 1,1-dioxide (3-TPVMTO) in  $\text{CDCl}_3$

**Figure S19.**  $^{13}\text{C}$  NMR spectra of 2,5-dimethyl-3-(1,2,2-triphenylvinyl)thiophene 1,1-dioxide (3-TPVMTO) in  $\text{CDCl}_3$

**Figure S20.**  $^1\text{H}$  NMR spectra of ((Z)-(1,2-diphenyl)-(Z)-di(4,4,5,5-tetramethyl-1,3,2-dioxaborolan-2-yl))ethene (DPDBE)

**Figure S21.**  $^{13}\text{C}$  NMR spectra of 3-bromo-2,5-dimethylthiophene (3-BDMT)

**Figure S22.**  $^1\text{H}$  NMR spectra of 3-(1,2,2-TriPhenylVinyl)Thiophene (3-TPVT)

**Figure S23.**  $^{13}\text{C}$  NMR spectra of 3-(1,2,2-triphenylvinyl)thiophene 1,1-dioxide (3-TPVTO)

**Figure S24.**  $^1\text{H}$  NMR spectra of (E)-2-(2-(2,5-dimethylthiophen-3-yl)-1,2-diphenylvinyl)-4,4,5,5-tetramethyl-1,3,2-dioxaborolane (DPVBT)

**Figure S25.**  $^{13}\text{C}$  NMR spectra of 2,5-dimethyl-3-(1,2,2-triphenylvinyl)thiophene (3-TPVMT)

**Figure S26** Mass spectrum of 2,5-dimethyl-3-(1,2,2-triphenylvinyl)thiophene 1,1-dioxide (3-TPVMTO)

## 1. Experimental Section

**Synthesis of ((Z)-(1,2-diphenyl)-(Z)-di(4,4,5,5-tetramethyl-1,3,2-dioxaborolan-2-yl))ethene (DPDBE).** A certain amount of Pt(PPh<sub>3</sub>)<sub>4</sub> (0.35 g, 1 mol%) was added to a degassed solution of diphenylacetylene (5.00 g, 28.0 mmol) and bis(pinacolato)diboron (14.25 g, 56.0 mmol) in DMF (150 ml), and then the mixture was heated at 90 °C for 24 h. After cooling to room temperature, the reaction mixture was extracted three times with ethyl acetate. The crude product of DPDBE was obtained after removal of the solvent under reduced pressure. DPDBE (10.00 g) was obtained by washing several times with ethanol as a white solid in a yield of 82%. Molecular formula: C<sub>26</sub>H<sub>34</sub>B<sub>2</sub>O<sub>4</sub>. <sup>1</sup>H NMR (400 MHz, CDCl<sub>3</sub>) δ 7.19 – 7.14 (m, 2H), 7.12 – 7.08 (m, 6H), 6.99 (dd, *J* = 6.6, 3.0 Hz, 2H), 6.55 (s, 1H), 2.37 (s, 6H), 1.15 (s, 12H). <sup>13</sup>C NMR (101 MHz, CDCl<sub>3</sub>) δ 141.27, 129.31, 127.42, 125.78, 84.07, 24.89. HRMS (*m/z*): calcd. for [M+H]<sup>+</sup> 433.2643, found 433.2725.

**Synthesis of 3-bromo-2,5-dimethylthiophene (3-BDMT).** A certain amount of N-bromosuccinimide (1.58 g, 8.9 mmol) was added to a solution of 2,5-dimethylthiophene (1.00 g, 8.9 mmol) in acetic acid, and then mixture was stirred at room temperature overnight. After the reaction was completed, the mixture was poured into water and extracted 3 times with dichloromethane. The organic layer was dried over anhydrous sodium sulfate. After removing the solvent under reduced pressure, the crude product was purified by column chromatography on silica gel (petroleum ether) to obtain a colorless liquid (1.55 g, 91.3%). Molecular formula: C<sub>6</sub>H<sub>7</sub>BrS. <sup>1</sup>H NMR (400 MHz, CDCl<sub>3</sub>) δ 6.56 (s, 1H), 2.40 (s, 3H), 2.33 (s, 3H). <sup>13</sup>C NMR (101 MHz, CDCl<sub>3</sub>) δ 136.88, 131.58, 127.58, 107.97, 15.31, 14.53. MS (*m/z*): calcd. for [M]<sup>+</sup> 191.9, found 191.9.

**Synthesis of 3-(1,2,2-triphenylvinyl)thiophene (1a).** 3-Thienylboronic acid (1.02 g, 9.0 mmol), 1-bromo-1,2,2-triphenylethylene (2.01 g, 6.0 mmol), and potassium carbonate (1.24 g, 9.0 mmol) were dissolved in a mixed solution of toluene (60 mL) and tetrahydrofuran (30 mL). The reaction solution was stirred at room temperature under nitrogen for 30 min, and then Pd(PPh<sub>3</sub>)<sub>4</sub> (50 mg, 0.043 mmol) was added. The resulting solution was heated at 80 °C for 18 h. After the reaction was completed, the mixture was poured into water and extracted 3 times with dichloromethane. The organic layer was dried over anhydrous sodium sulfate. After removing the solvent under reduced pressure, the crude product was purified by column chromatography on silica gel (petroleum ether) to obtain a white solid powder (1.43 g, 70.5%). Molecular formula: C<sub>24</sub>H<sub>18</sub>S. <sup>1</sup>H NMR (400 MHz, CDCl<sub>3</sub>) δ 7.22 – 7.19 (m, 3H), 7.12–7.16 (m, 5H), 7.12 – 7.08 (m, 5H), 7.04 – 7.00 (m, 3H), 6.76 (d, *J* = 5.0 Hz, 1H), 6.59 (d, *J* = 5.0 Hz,

1H). <sup>13</sup>C NMR (101 MHz, CDCl<sub>3</sub>) δ 144.09, 143.44, 140.62, 135.48, 131.20, 130.85, 130.08, 127.96, 127.64, 126.67, 126.33, 126.01, 123.67. HRMS (m/z): calcd. for [M+H]<sup>+</sup> 339.1163, found 339.1198.

**Synthesis of 3-(1,2,2-triphenylvinyl)thiophene 1,1-dioxide (2a).** A solution of m-chloroperbenzoic acid (m-CPBA) (2.03 g, 11.8 mmol) in 60 mL of CH<sub>2</sub>Cl<sub>2</sub> was added over a period of 1 h to a stirred solution of 2-(1,2,2-triphenylvinyl)thiophene (1.00 g, 3.0 mmol) in 60 mL of CH<sub>2</sub>Cl<sub>2</sub>. After the addition, the mixture was stirred at room temperature for 24 h. After the reaction was completed, the mixture washed with aqueous NaHSO<sub>3</sub>, NaHCO<sub>3</sub>, and water, and then the organic layer was dried over anhydrous sodium sulfate. After removing the solvent under reduced pressure, the crude product was purified by column chromatography on silica gel (petroleum ether) to obtain a yellow solid (0.94 g, 86.4%). Molecular formula: C<sub>24</sub>H<sub>18</sub>O<sub>2</sub>S. <sup>1</sup>H NMR (400 MHz, CDCl<sub>3</sub>) δ 7.40 – 7.35 (m, 3H), 7.23 – 7.18 (m, 5H), 7.14 – 7.08 (m, 5H), 6.94 (d, J = 8.1 Hz, 2H), 6.28 (d, J = 6.8 Hz, 1H), 6.08 (s, 1H), 6.04 (d, J = 6.8 Hz, 1H). <sup>13</sup>C NMR (101 MHz, CDCl<sub>3</sub>) δ 148.37, 145.70, 141.96, 141.59, 140.79, 132.81, 132.09, 131.24, 130.94, 129.41, 128.83, 128.51, 127.85. HRMS (m/z): calcd. for [M+H]<sup>+</sup> 371.1061, found 371.1100.

**Synthesis of (E)-2-(2-(2,5-dimethylthiophen-3-yl)-1,2-diphenylvinyl)-4,4,5,5-tetramethyl-1,3,2-dioxaborolane (DPVBT).** ((Z)-(1,2-diphenyl)-(Z)-di(4,4,5,5-tetramethyl-1,3,2-dioxaborolan-2-yl))ethene (2.00 g, 4.6 mmol), 3-bromo-2,5-dimethylthiophene (2.01 g, 6.9 mmol), and potassium carbonate (1.32 g, 9.0 mmol) were dissolved in a mixed solution of 1,4-dioxane (60 mL). The reaction solution was stirred at room temperature under nitrogen for 30 min, and then Pd (PPh<sub>3</sub>)<sub>4</sub> (265 mg, 0.23 mmol) was added. The resulting solution was heated at 80 °C for 16 h. After the reaction was completed, the mixture was poured into water and extracted 3 times with ethyl acetate. The organic layer was dried over anhydrous sodium sulfate. After removing the solvent under reduced pressure, the crude product was purified by column chromatography on silica gel (petroleum ether) to obtain a white solid (1.49 g, 78.3%). Molecular formula: C<sub>26</sub>H<sub>29</sub>BO<sub>2</sub>S. <sup>1</sup>H NMR (400 MHz, CDCl<sub>3</sub>) δ 7.16 – 7.12 (m, 2H), 7.07 (m, 6H), 6.98 – 6.95 (m, 2H), 6.52 (s, 1H), 2.35 (s, 6H), 1.12 (s, 12H). <sup>13</sup>C NMR (101 MHz, CDCl<sub>3</sub>) δ 144.72, 141.13, 140.75, 135.04, 134.21, 130.05, 129.31, 128.10, 127.72, 126.78, 125.97, 83.56, 24.48, 15.12, 13.84. HRMS (m/z): calcd. for [M+H]<sup>+</sup> 417.2015, found 417.2063.

**Synthesis of 2,5-dimethyl-3-(1,2,2-triphenylvinyl)thiophene (3a).** (E)-2-(2-(2,5-dimethylthiophen-3-yl)-1,2-diphenylvinyl)-4,4,5,5-tetramethyl-1,3,2-dioxaborolane (2.00 g, 4.8 mmol), bromobenzene (0.98 g, 6.2 mmol), and potassium carbonate (1.32 g, 9.6 mmol) were dissolved in a mixed solution of 1,4-dioxane (60 mL). The reaction

solution was stirred at room temperature under nitrogen for 30 min, and then Pd (PPh<sub>3</sub>)<sub>4</sub> (277 mg, 0.24 mmol) was added. The resulting solution was heated at 80 °C for 16 h. After the reaction was completed, the mixture was poured into water and extracted 3 times with ethyl acetate. The organic layer was dried over anhydrous sodium sulfate. After removing the solvent under reduced pressure, the crude product was purified by column chromatography on silica gel (petroleum ether) to obtain a white solid (1.53g, 86.9%). Molecular formula: C<sub>26</sub>H<sub>22</sub>S. <sup>1</sup>H NMR (400 MHz, CDCl<sub>3</sub>) δ 7.15 – 7.08 (m, 9H), 7.06 (d, *J* = 4.0 Hz, 4H), 7.01 (d, *J* = 7.0 Hz, 2H), 6.27 (s, 1H), 2.31 (s, 3H), 1.90 (s, 3H). <sup>13</sup>C NMR (101 MHz, CDCl<sub>3</sub>) δ 143.93, 143.40, 142.79, 142.06, 139.41, 135.43, 134.92, 133.37, 131.54, 130.60, 128.22, 127.69, 127.59, 127.48, 126.49, 126.41, 126.32, 15.23, 13.92. HRMS (*m/z*): calcd. for [M+H]<sup>+</sup> 367.1476, found 367.1506.

**Synthesis of 2,5-dimethyl-3-(1,2,2-triphenylvinyl)thiophene 1,1-dioxide (4a).** A solution of *m*-chloroperbenzoic acid (*m*-CPBA) (1.86 g, 10.8 mmol) in 60 mL of CH<sub>2</sub>Cl<sub>2</sub> was added over a period of 1 h to a stirred solution of 2,5-dimethyl-3-(1,2,2-triphenylvinyl)thiophene (1.00 g, 2.7 mmol) in 60 mL of CH<sub>2</sub>Cl<sub>2</sub>. After the addition, the mixture was stirred at room temperature for 24 h. After the reaction was completed, the mixture was washed with aqueous NaHSO<sub>3</sub>, NaHCO<sub>3</sub>, and water, and then the organic layer was dried over anhydrous sodium sulfate. After removing the solvent under reduced pressure, the crude product was purified by column chromatography on silica gel (petroleum ether) to obtain a white solid (0.91 g, 84.2%). Molecular formula: C<sub>26</sub>H<sub>12</sub>O<sub>2</sub>S. <sup>1</sup>H NMR (400 MHz, CDCl<sub>3</sub>) δ 7.32 (dd, *J* = 5.1, 1.9 Hz, 3H), 7.18 (dd, *J* = 3.6, 2.8 Hz, 5H), 7.16 (s, 1H), 7.14 – 7.12 (m, 2H), 7.05 – 7.01 (m, 4H), 5.97 (s, 1H), 2.04 (s, 3H), 1.58 (s, 3H). <sup>13</sup>C NMR (101 MHz, CDCl<sub>3</sub>) δ 146.78, 142.11, 141.62, 138.65, 137.84, 136.44, 133.47, 131.77, 131.45, 130.65, 130.10, 128.47, 128.43, 128.37, 127.91, 127.66, 127.63, 127.01, 9.09, 8.09. HRMS (*m/z*): calcd. for [M+H]<sup>+</sup> 399.1374, found 399.1413.

## 2. Computational Details

All the calculations were performed with density functional theory (DFT) and time-dependent density functional theory (TDDFT) implemented in Gaussian 09 program package.<sup>1</sup> The ground state equilibrium geometries and the normal modes of vibration of the single-molecules of 1a, 2a, 3a and 4a were computed using density functional theory (DFT) with the hybrid M062X functional at 6-311+G(d,p) level.<sup>2</sup> NBO analysis of all the four compounds and their photocyclized products were performed with the same basis set to the optimization.

### 3. Supplementary Schemes and Figures

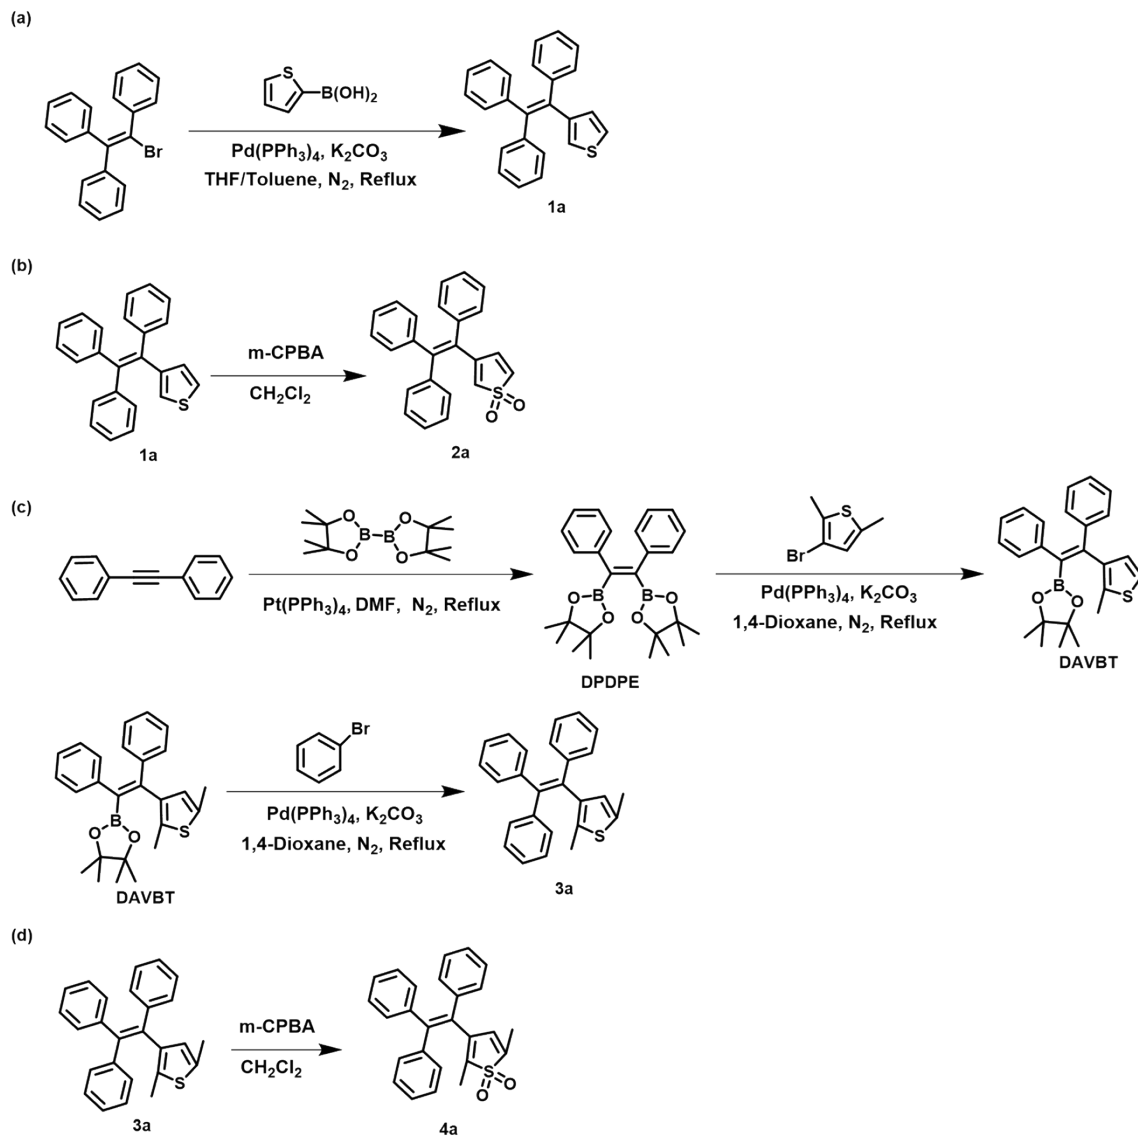

Scheme S1. Synthesis routes of 1a, 2a, 3a and 4a.



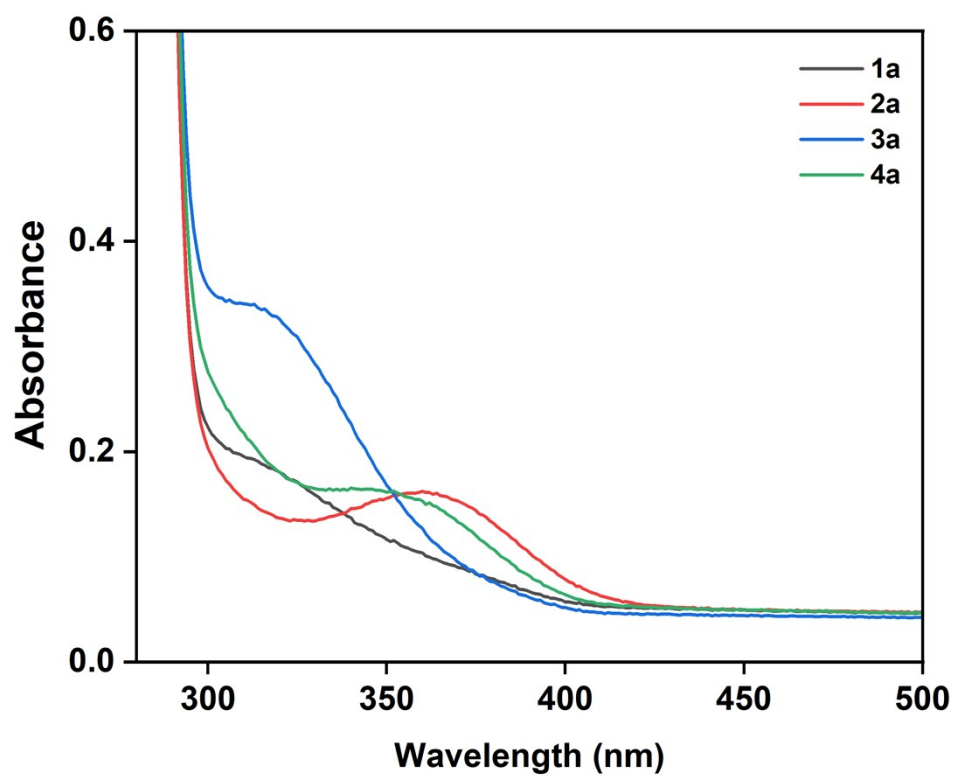

Figure S1. UV-visible spectra of 1a, 2a, 3a and 4a in THF at 25.0  $\mu\text{M}$ .

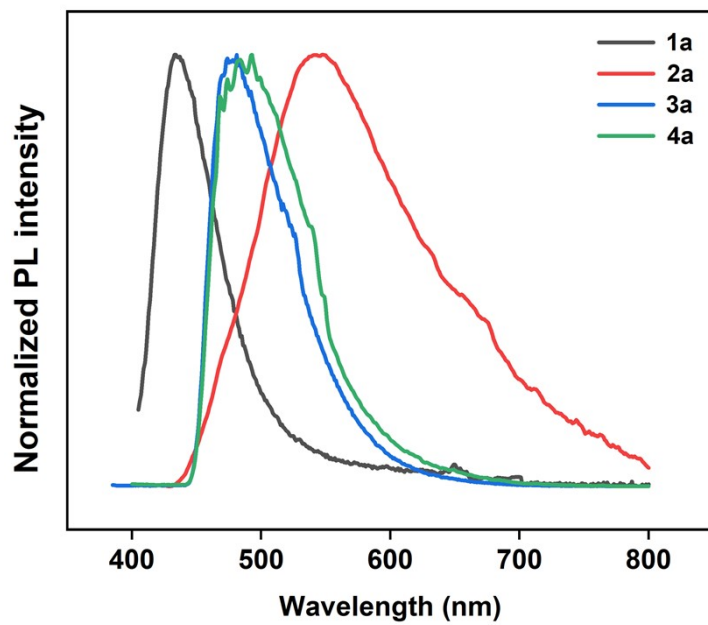

Figure S2. Normalized PL spectra 1a, 2a, 3a and 4a in solid under transient UV irradiation.

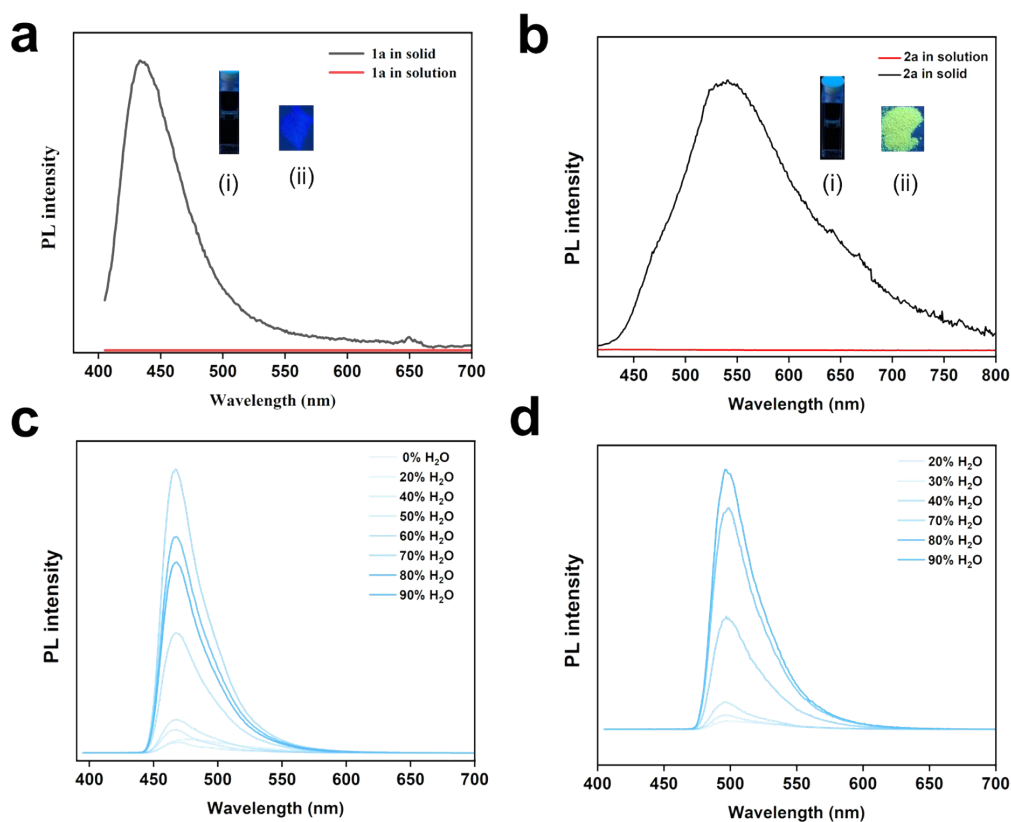

**Figure S3.** (a-b) PL spectra and images of 1a (a) and 2a (b) in solution and in solid state. (c-d) PL spectra of 1a and 2a in THF (50.0 mM) within creasing amounts of water from 0% to 90%.

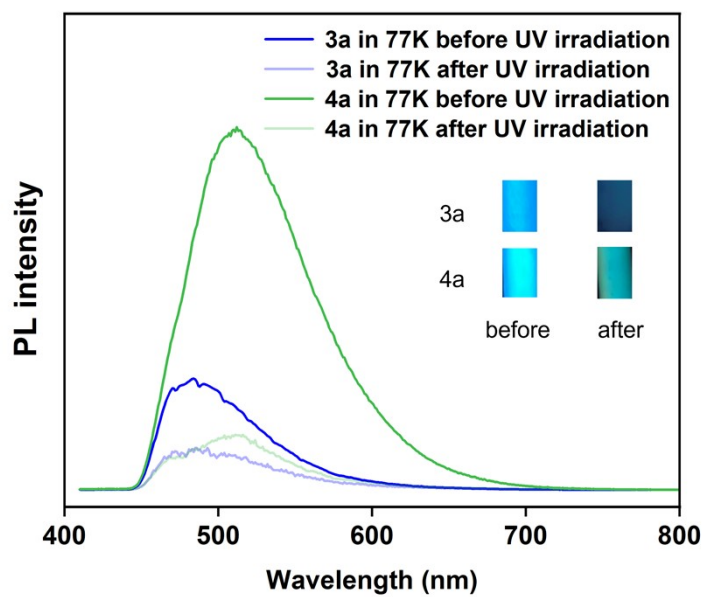

**Figure S4.** PL spectra of 3a and 4a in THF(50 μM) at 77 K before and after irradiation.

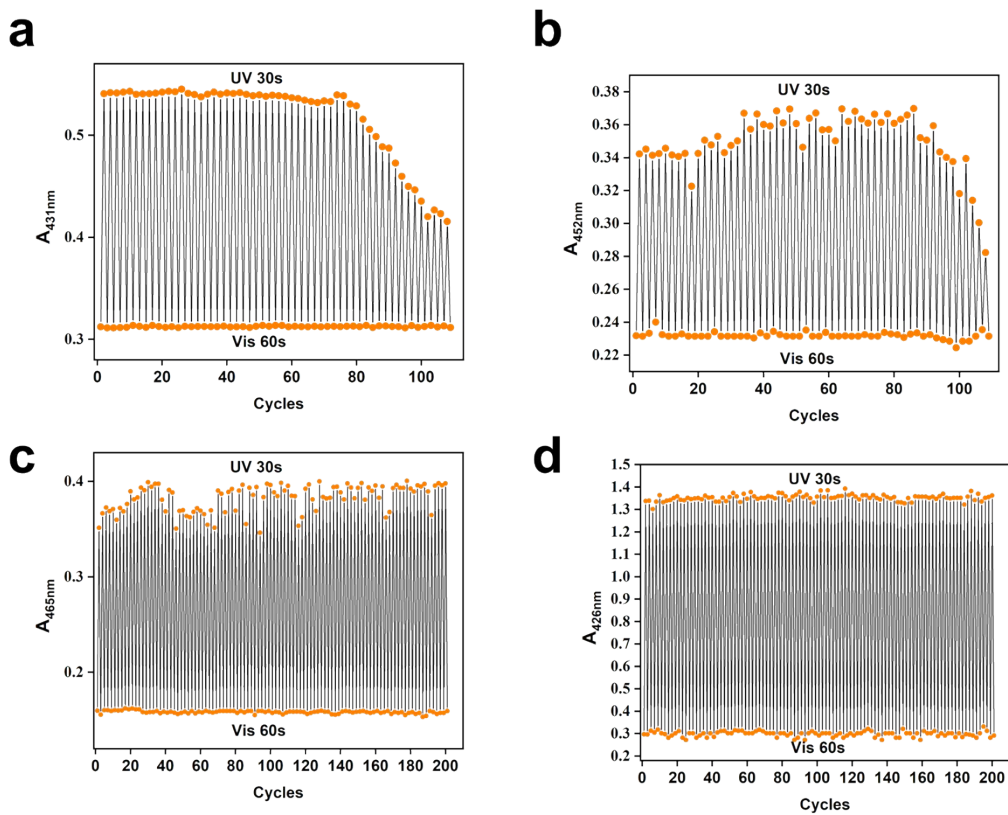

**Figure S5.** Photochromic recycles of 1a (a), 2a (b), 3a (c) and 4a (d) in film as a function of exposure to UV-light (365 nm) and visible-light (440 nm) respectively.

## 4. Supplementary Tables

**Table S1.** Optical properties of the four compounds in solution, film and solid.

|    | solution                 |                          |              |              | film                     |                          | solid                    |                          |                          |                          |            |
|----|--------------------------|--------------------------|--------------|--------------|--------------------------|--------------------------|--------------------------|--------------------------|--------------------------|--------------------------|------------|
|    | $\lambda_{ab}^a$<br>(nm) | $\lambda_{ab}^b$<br>(nm) | $\Phi_{o-c}$ | $\Phi_{c-o}$ | $\lambda_{ab}^a$<br>(nm) | $\lambda_{ab}^b$<br>(nm) | $\lambda_{ab}^a$<br>(nm) | $\lambda_{ab}^b$<br>(nm) | $\lambda_{fl}^a$<br>(nm) | $\lambda_{fl}^b$<br>(nm) | $\Phi(\%)$ |
| 1a | 311                      | 462                      | 0.0372       | 0.0141       | 372                      | 452                      | 384                      | 506                      | 435                      | 424                      | 3.7        |
| 2a | 362                      | 448                      | 0.0753       | 0.0284       | 387                      | 454                      | 430                      | 488                      | 549                      | 541                      | 11.4       |
| 3a | 325                      | 469                      | 0.0380       | 0.0203       | 362                      | 465                      | 366                      | 501                      |                          |                          |            |
| 4a | 365                      | 454                      | 0.4506       | 0.2759       | 392                      | 458                      | 366                      | 482                      |                          |                          |            |

$\lambda_{ab}$  and  $\lambda_{fl}$  represents absorption maximum and fluorescence maximum respectively.

<sup>a</sup> The open form. <sup>b</sup> The closed form.

**Table S2.** Compositions of natural transition orbitals of cyclized forms 1a, 2a, 3a and 4a for  $S_0 \rightarrow S_1$  state.

| Compounds | NTOs      | Contribution (%) |
|-----------|-----------|------------------|
| 1a        | HOMO→LUMO | 100              |
| 2a        | HOMO→LUMO | 100              |
| 3a        | HOMO→LUMO | 100              |
| 4a        | HOMO→LUMO | 100              |

**Table S3.** Contribution ratios of different groups to natural transition orbitals of 1a, 2a, 3a and 4a.

| Compounds | Group                         | Contribution to HOMO (%) | Contribution to LUMO (%) |
|-----------|-------------------------------|--------------------------|--------------------------|
| 1a        | ethene                        | 18.09                    | 16.24                    |
|           | phenyl                        | 37.07                    | 48.35                    |
|           | thiophene                     | 39.27                    | 30.70                    |
|           | S                             | 12.88                    | 2.52                     |
| 2a        | ethene                        | 19.32                    | 18.49                    |
|           | phenyl                        | 50.13                    | 42.21                    |
|           | thiophene dioxide             | 23.33                    | 35.20                    |
|           | S                             | 0.15                     | 0.65                     |
| 3a        | ethene                        | 15.90                    | 13.11                    |
|           | phenyl                        | 48.98                    | 49.79                    |
|           | 2,5-dimethylthiophene         | 35.11                    | 37.11                    |
|           | S                             | 12.23                    | 6.64                     |
| 4a        | ethene                        | 15.97                    | 13.97                    |
|           | phenyl                        | 55.12                    | 54.19                    |
|           | 2,5-dimethylthiophene dioxide | 18.93                    | 26.57                    |
|           | S                             | 0.23                     | 0.56                     |

## 5. NMR and MS Spectra of Compounds

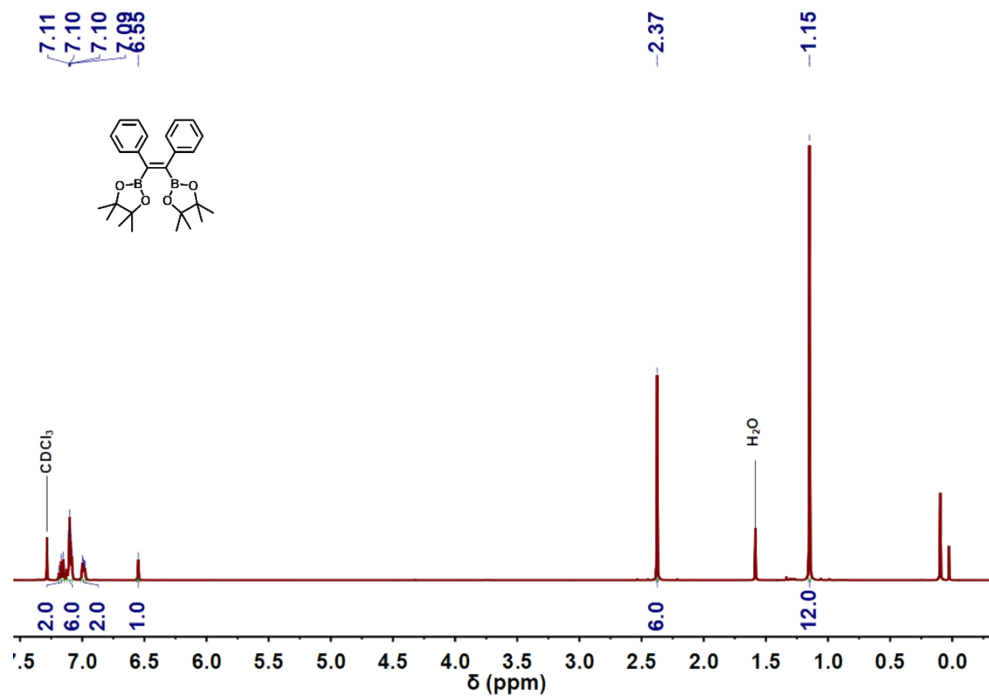

Figure S6. <sup>1</sup>H NMR spectra of ((Z)-(1,2-diphenyl)-(Z)-di(4,4,5,5-tetramethyl-1,3,2-dioxaborolan-2-yl))ethene (DPDBE) in CDCl<sub>3</sub>

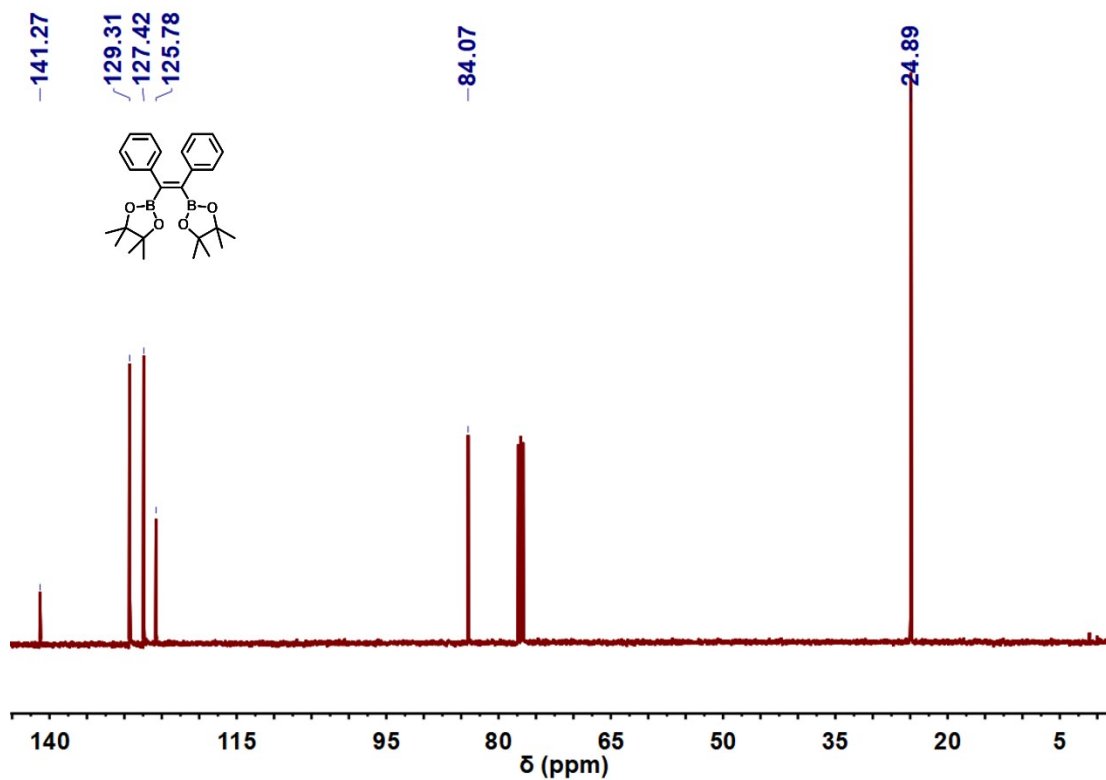

Figure S7. <sup>13</sup>C NMR spectra of ((Z)-(1,2-diphenyl)-(Z)-di(4,4,5,5-tetramethyl-1,3,2-dioxaborolan-2-yl))ethene (DPDBE) in CDCl<sub>3</sub>

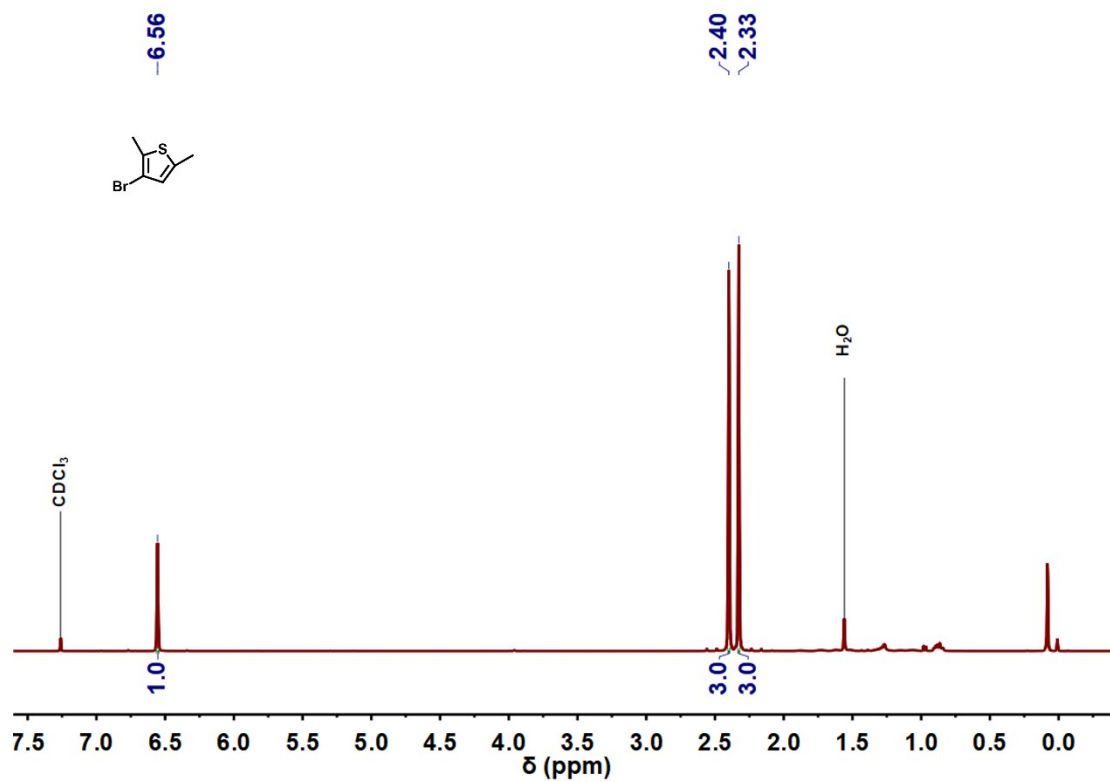

Figure S8.  $^1\text{H}$  NMR spectra of 3-bromo-2,5-dimethylthiophene (3-BDMT) in  $\text{CDCl}_3$

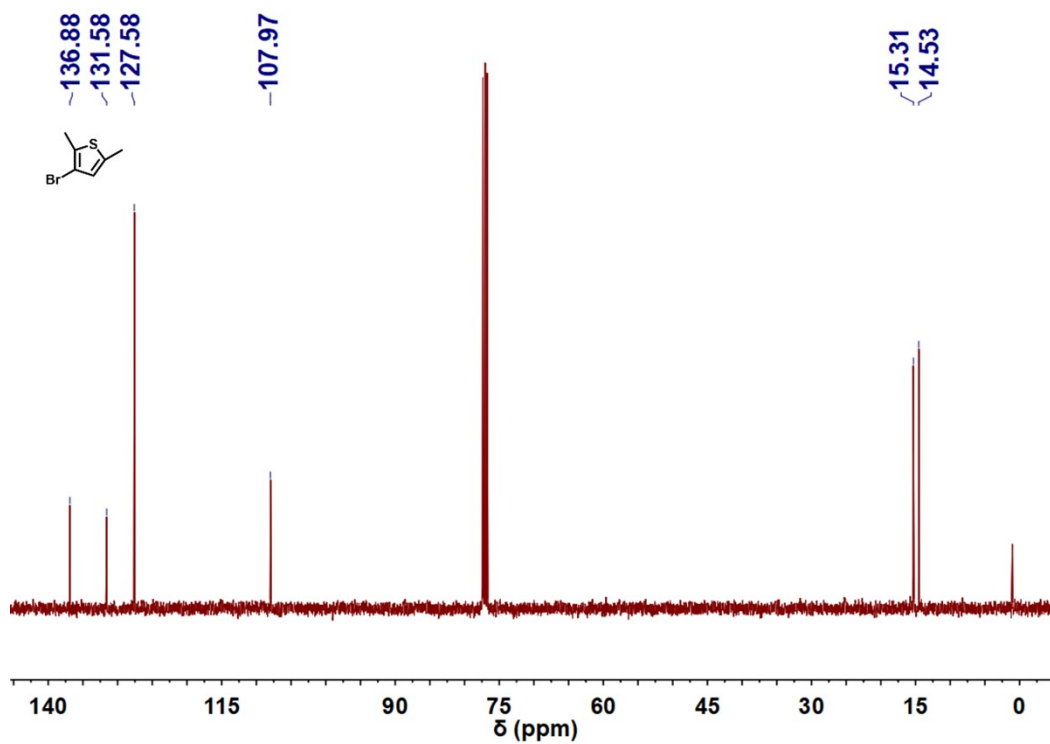

Figure S9.  $^{13}\text{C}$  NMR spectra of 3-bromo-2,5-dimethylthiophene (3-BDMT) in  $\text{CDCl}_3$

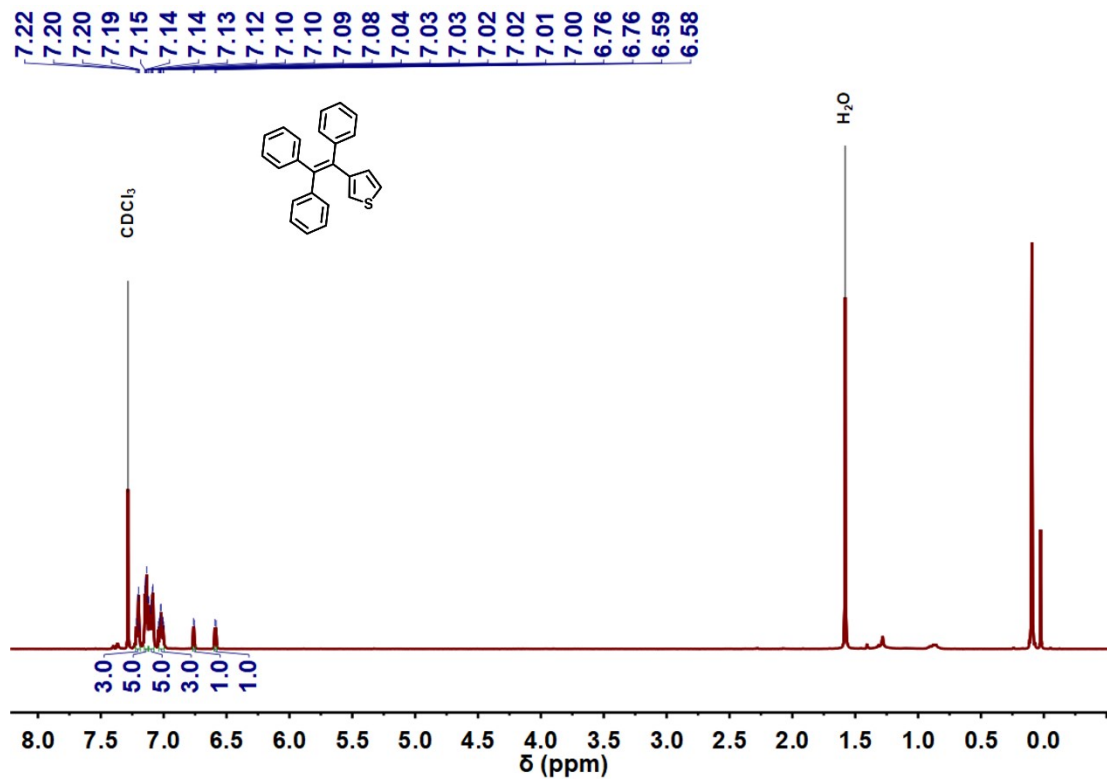

Figure S10. <sup>1</sup>H NMR spectra of 3-(1,2,2-TriPhenylVinyl)Thiophene (3-TPVT) in CDCl<sub>3</sub>

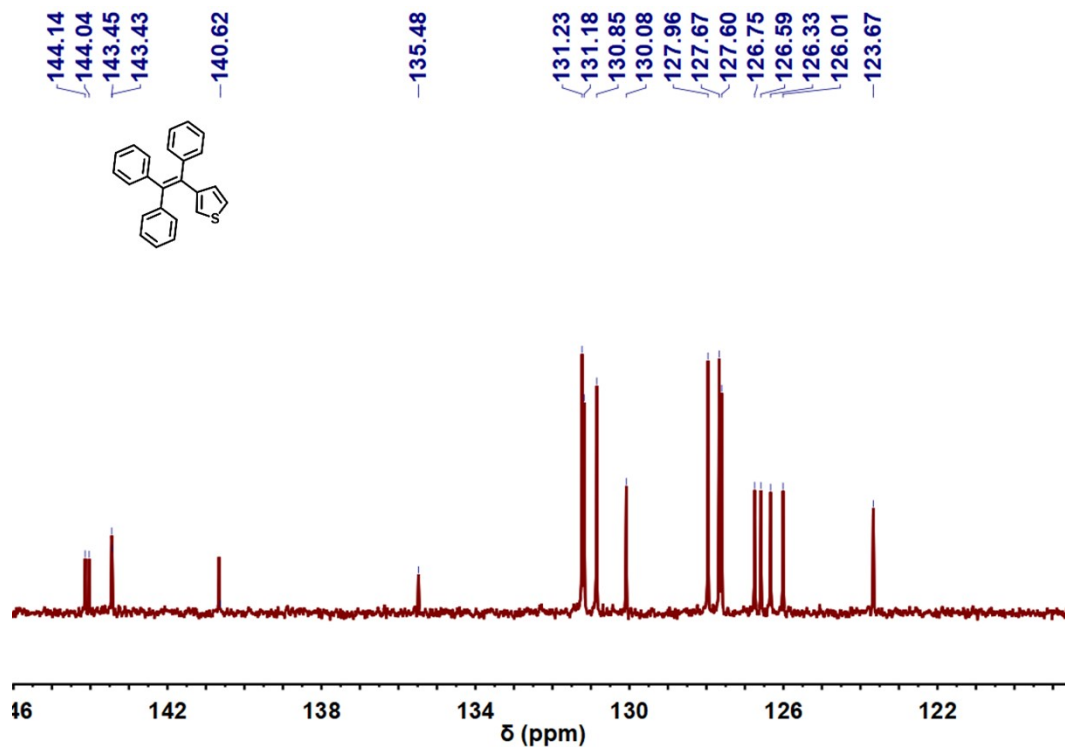

Figure S11. <sup>13</sup>C NMR spectra of 3-(1,2,2-TriPhenylVinyl)Thiophene (3-TPVT) in CDCl<sub>3</sub>

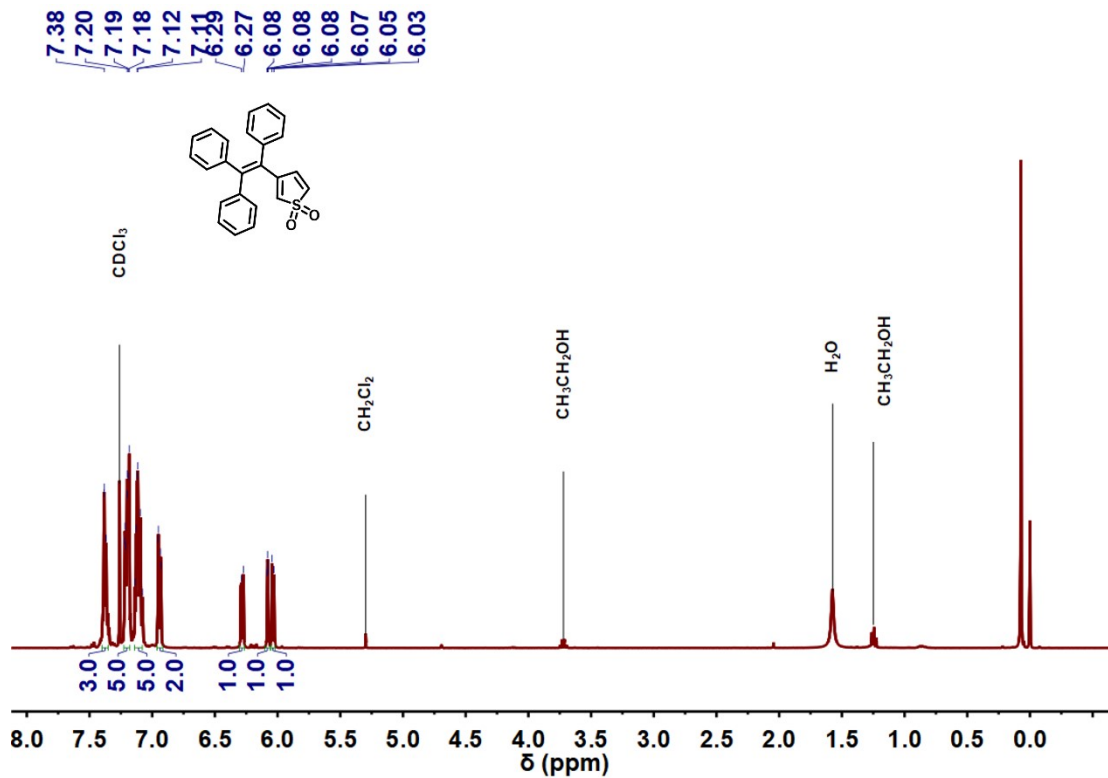

Figure S12. <sup>1</sup>H NMR spectra of 3-(1,2,2-triphenylvinyl)thiophene 1,1-dioxide (3-TPVTO) in CDCl<sub>3</sub>

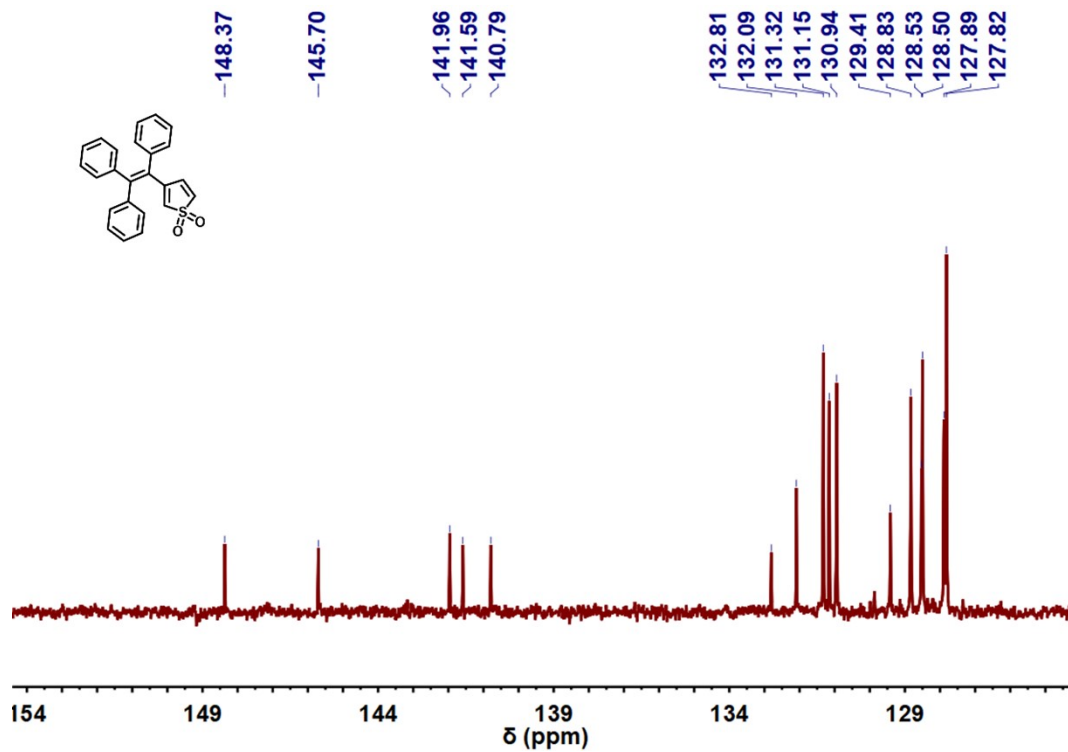

Figure S13. <sup>13</sup>C NMR spectra of 3-(1,2,2-triphenylvinyl)thiophene 1,1-dioxide (3-TPVTO) in CDCl<sub>3</sub>



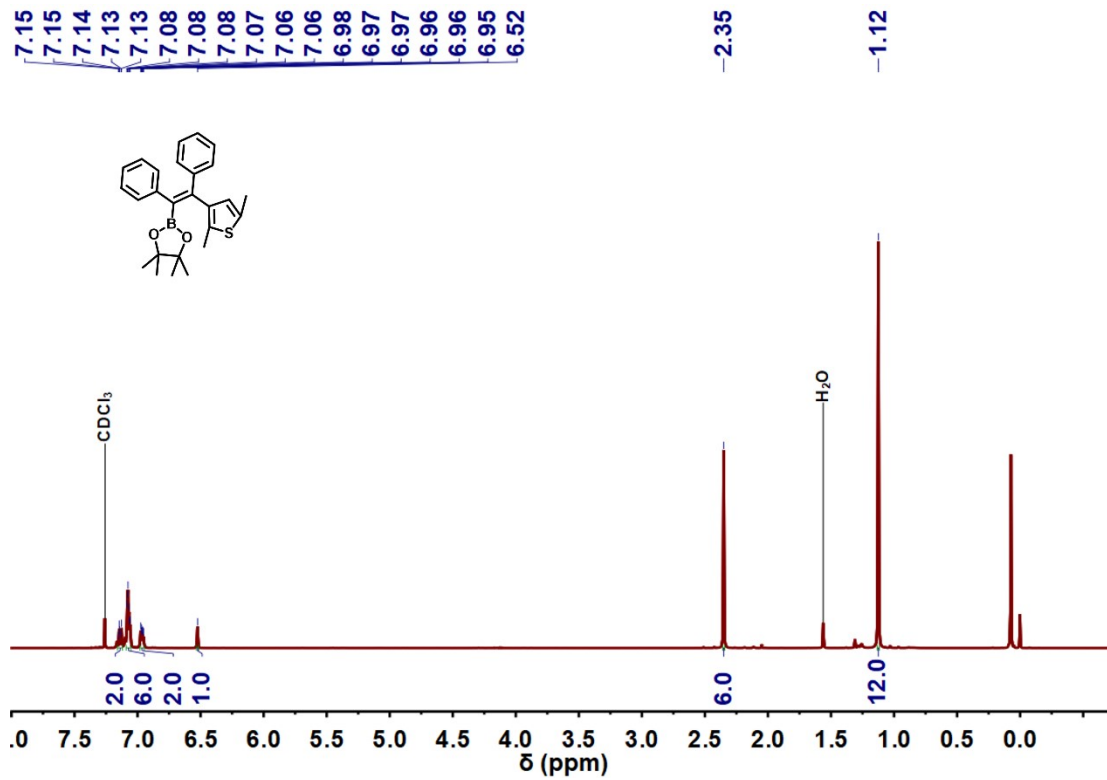

Figure S14.  $^1\text{H}$  NMR spectra of (E)-2-(2-(2,5-dimethylthiophen-3-yl)-1,2-diphenylvinyl)-4,4,5,5-tetramethyl-1,3,2-dioxaborolane (DPVBT) in  $\text{CDCl}_3$

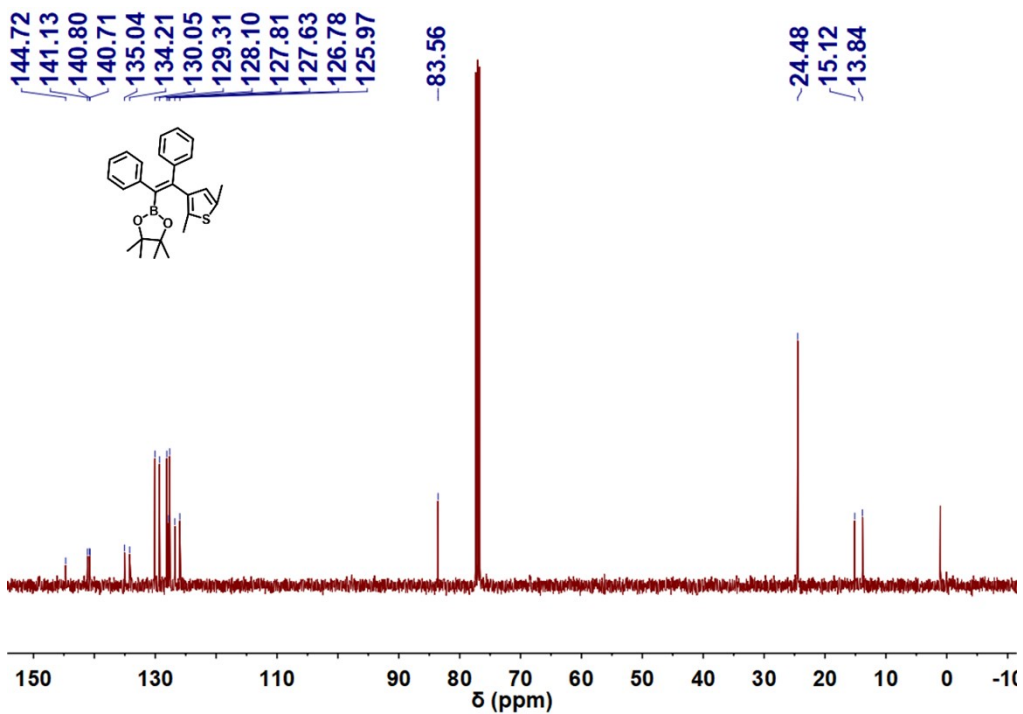

Figure S15.  $^{13}\text{C}$  NMR spectra of (E)-2-(2-(2,5-dimethylthiophen-3-yl)-1,2-diphenylvinyl)-4,4,5,5-tetramethyl-1,3,2-dioxaborolane (DPVBT) in  $\text{CDCl}_3$

CDCl<sub>3</sub>

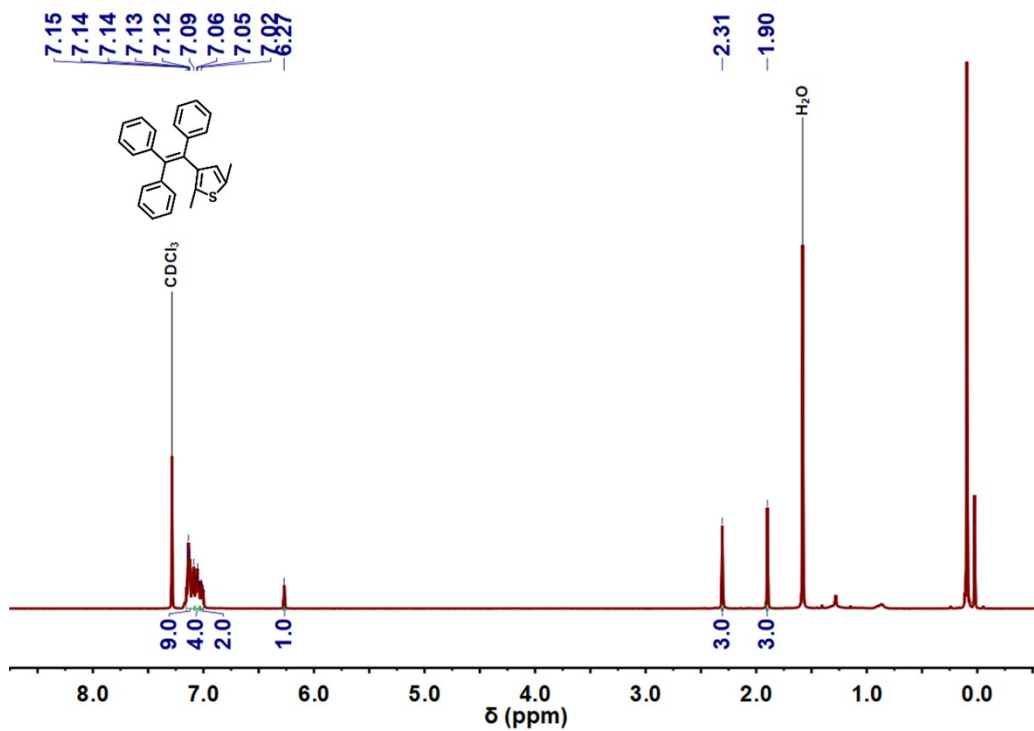

Figure S16. <sup>1</sup>H NMR spectra of 2,5-dimethyl-3-(1,2,2-triphenylvinyl)thiophene (3-TPVMT) in CDCl<sub>3</sub>

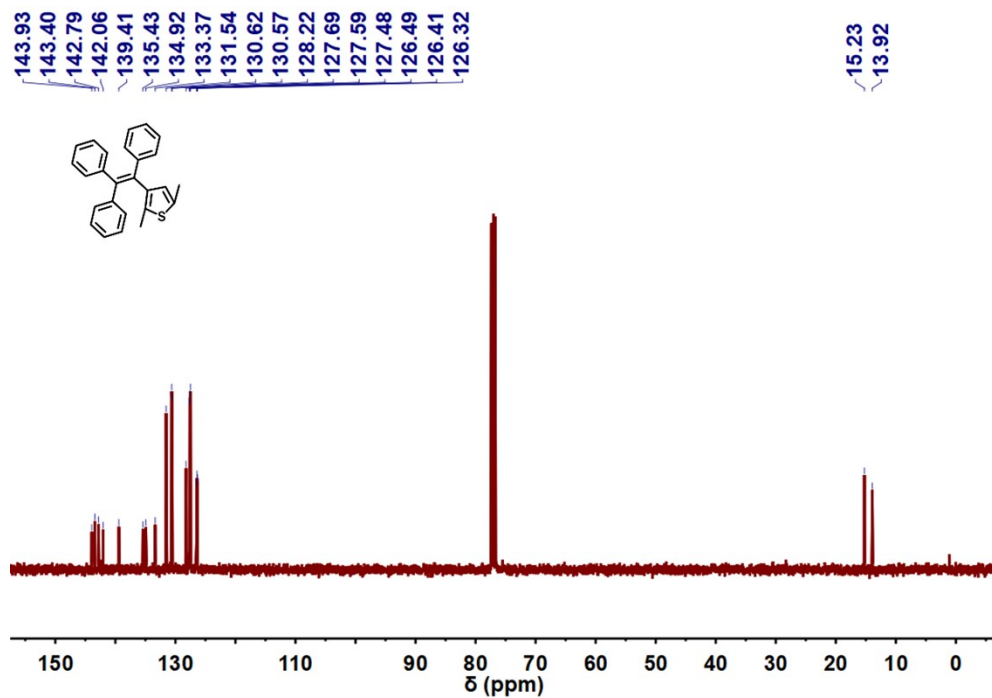

Figure S17. <sup>13</sup>C NMR spectra of 2,5-dimethyl-3-(1,2,2-triphenylvinyl)thiophene (3-TPVMT) in CDCl<sub>3</sub>

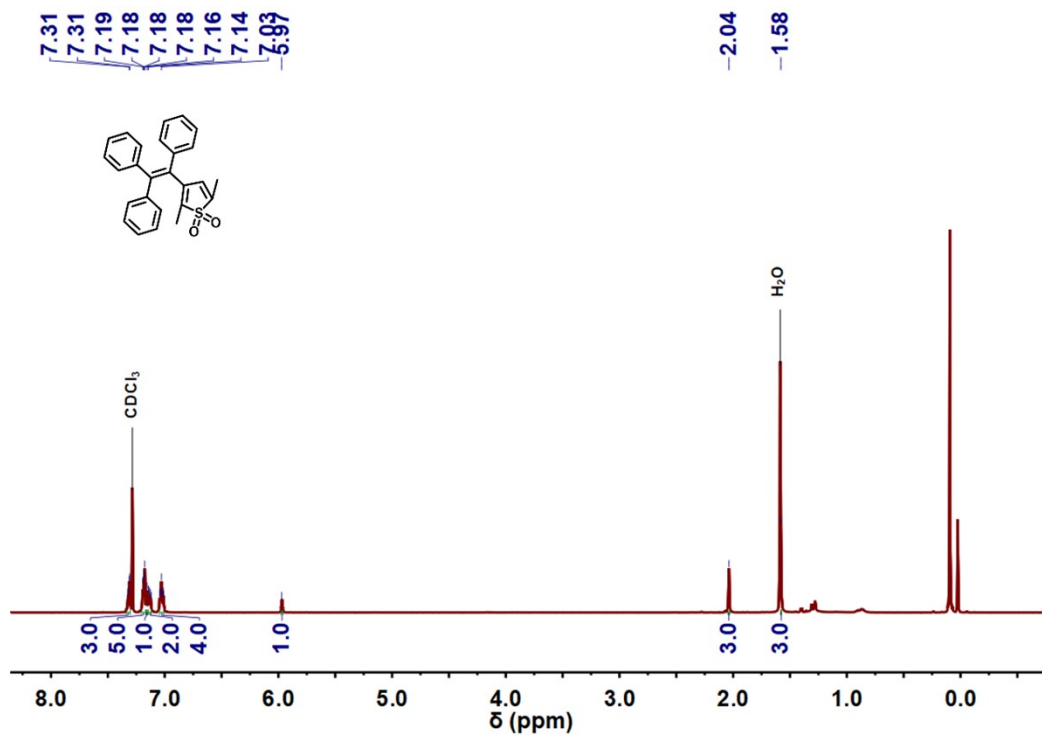

Figure S18. <sup>1</sup>H NMR spectra of 2,5-dimethyl-3-(1,2,2-triphenylvinyl)thiophene 1,1-dioxide (3-TPVMTO) in CDCl<sub>3</sub> and 2,5-dimethyl-3-(1,2,2-triphenylvinyl)thiophene 1,1-dioxide (3-TPVMTO) in CDCl<sub>3</sub>

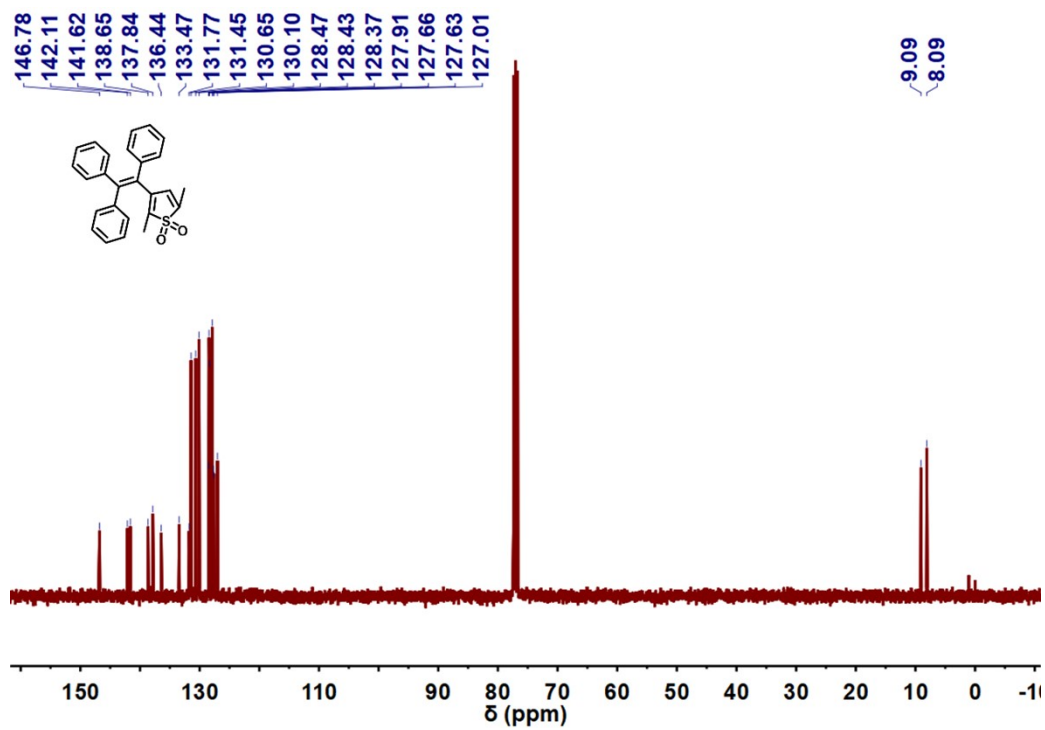

Figure S19. <sup>13</sup>C NMR spectra of 2,5-dimethyl-3-(1,2,2-triphenylvinyl)thiophene 1,1-dioxide (3-TPVMTO) in CDCl<sub>3</sub>

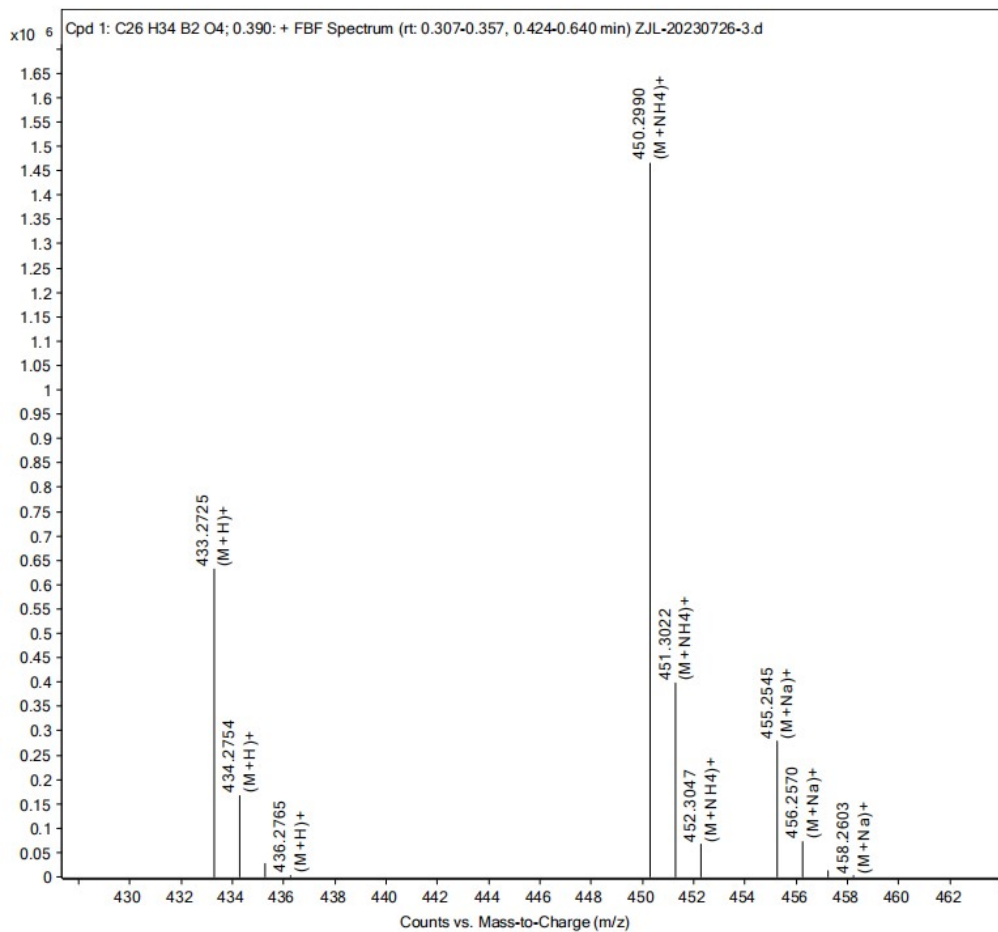

Figure S20. <sup>1</sup>H NMR spectra of ((Z)-(1,2-diphenyl)-(Z)-di(4,4,5,5-tetramethyl-1,3,2-dioxaborolan-2-yl)ethene (DPDBE)

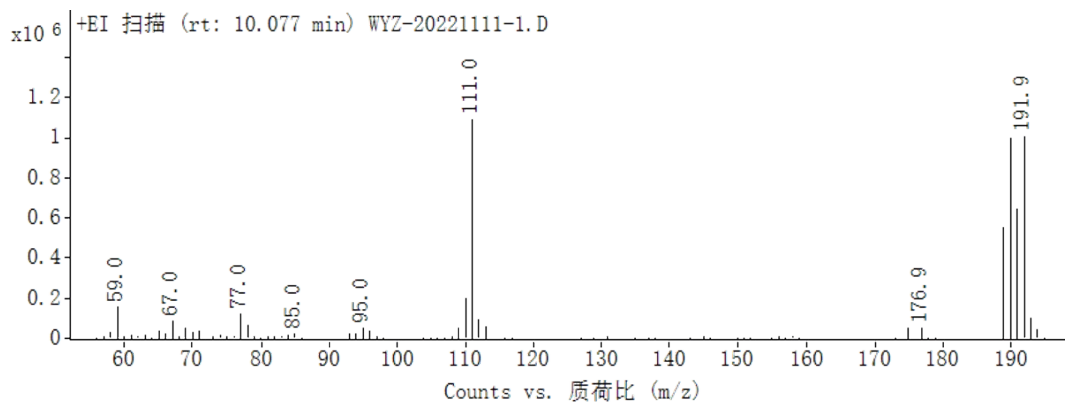

Figure S21. <sup>13</sup>C NMR spectra of 3-bromo-2,5-dimethylthiophene (3-BDMT)

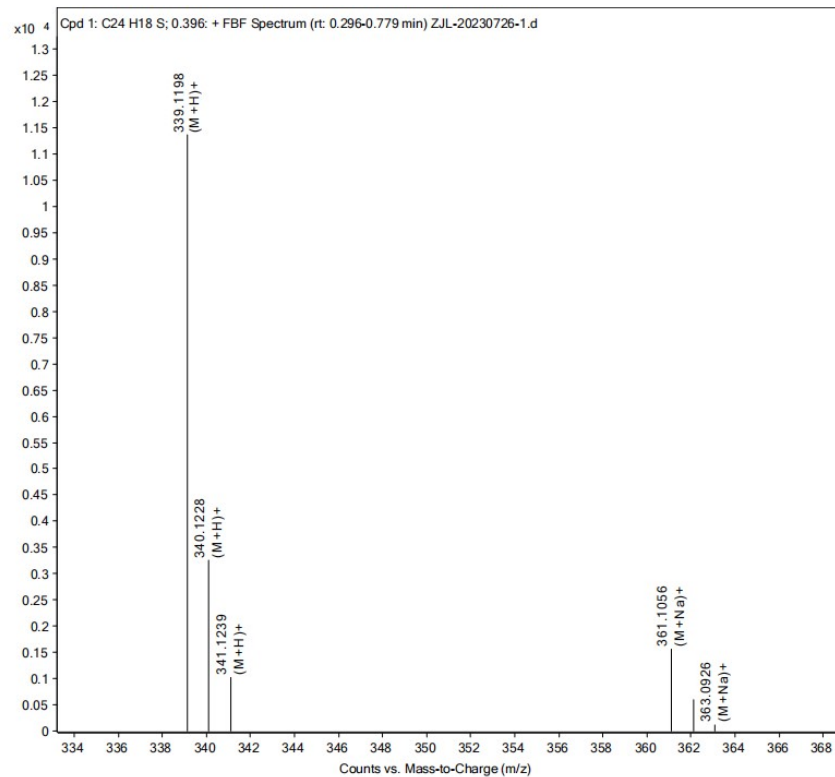

**Figure S22.** <sup>1</sup>H NMR spectra of 3-(1,2,2-TriphenylVinyl)Thiophene (3-TPVT)

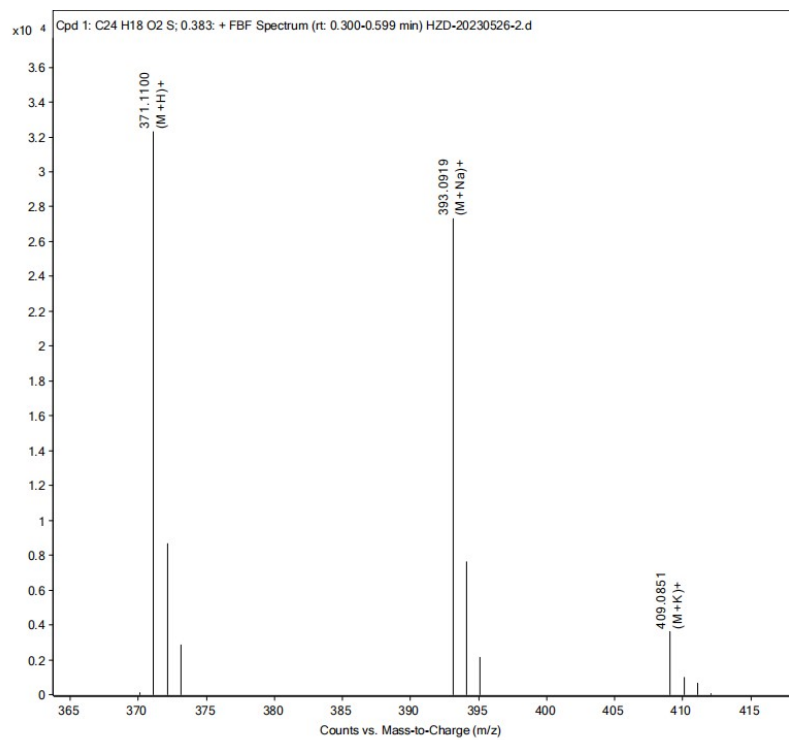

**Figure S23.** <sup>13</sup>C NMR spectra of 3-(1,2,2-triphenylvinyl)thiophene 1,1-dioxide (3-TPVTO)

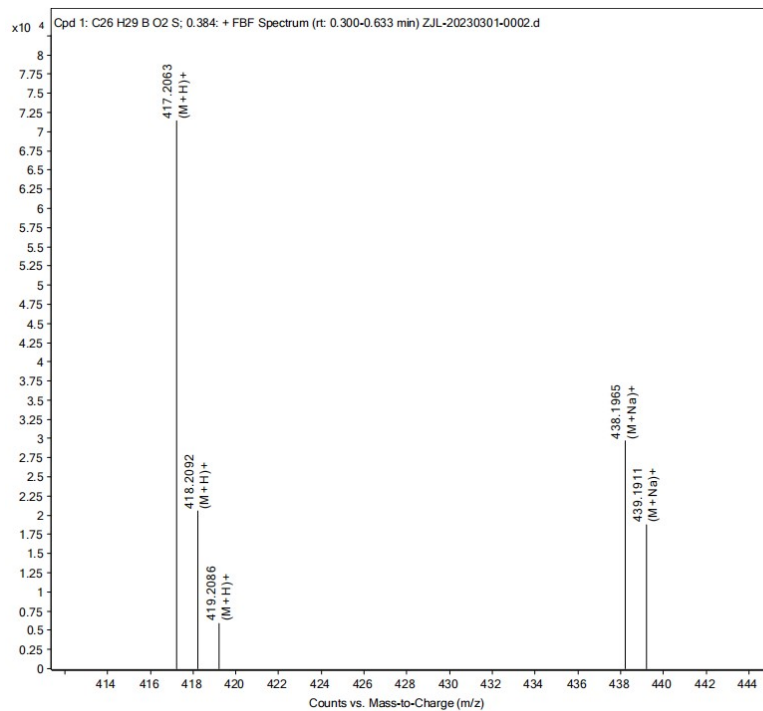

**Figure S24.** <sup>1</sup>H NMR spectra of (E)-2-(2-(2,5-dimethylthiophen-3-yl)-1,2-diphenylvinyl)-4,4,5,5-tetramethyl-1,3,2-dioxaborolane (DPVBT)

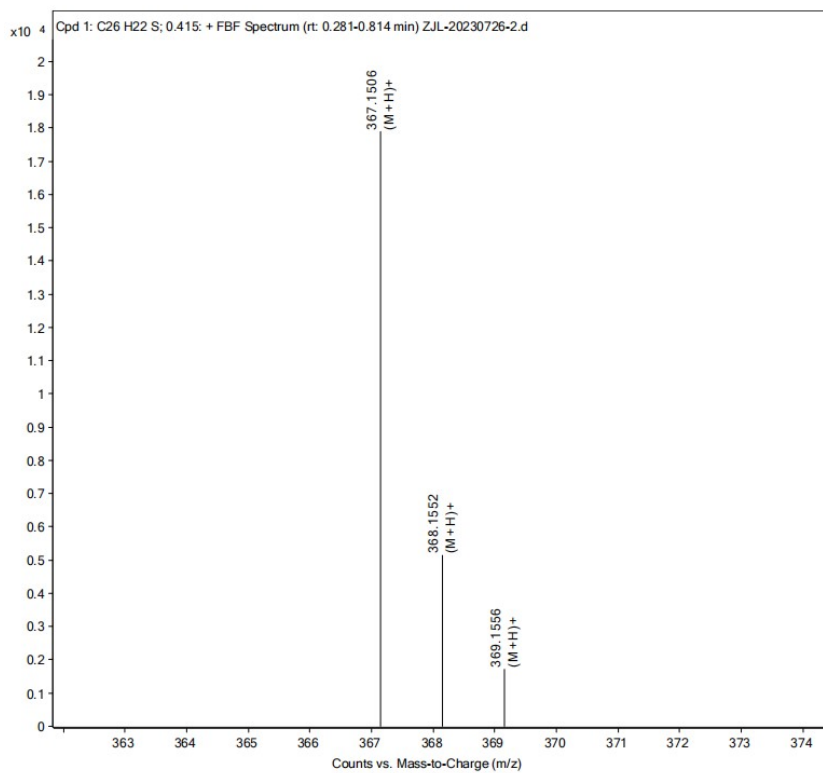

**Figure S25.** <sup>13</sup>C NMR spectra of 2,5-dimethyl-3-(1,2,2-triphenylvinyl)thiophene (3-TPVMT)

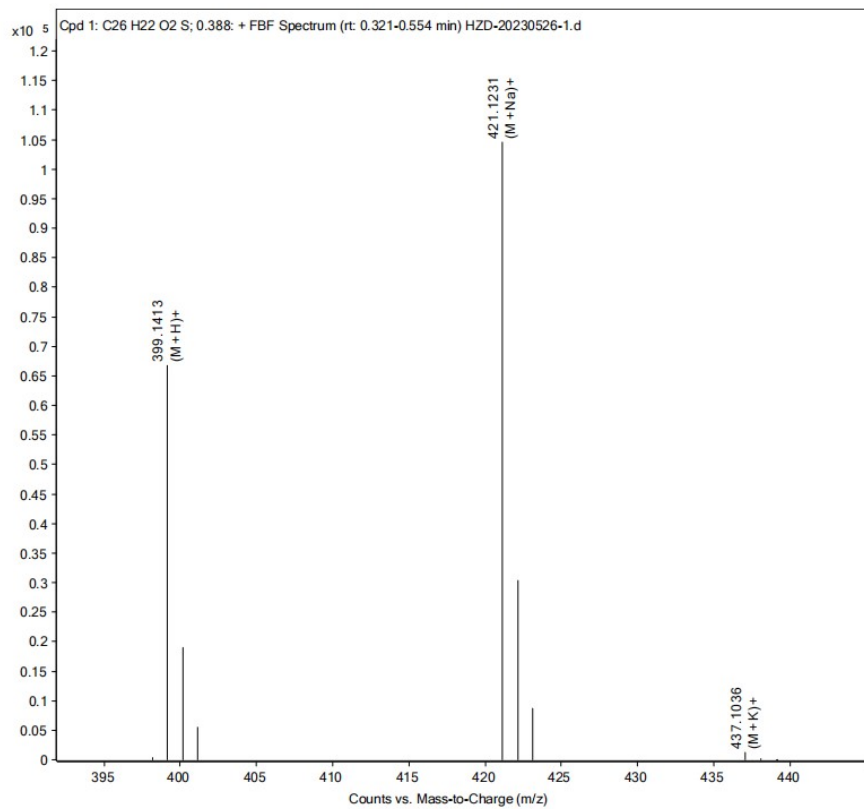

**Figure S26** Mass spectrum of 2,5-dimethyl-3-(1,2,2-triphenylvinyl)thiophene 1,1-dioxide (3-TPVMTO)
